# Supplementary material for: A Regulatory Role for NBS1 in Strand-Specific Mutagenesis during Somatic Hypermutation
Source: PLOS journal article supplement (doi:10.1371/journal.pone.0002482), 2008-06-24
Supplement: S4 (10.1371/journal.pone.0002482.s004) [file journal.pone.0002482.s004]

**Table S4.** Comparison of the nature of base substitutions in the V<sub>H</sub>3-23 genes between NBS patients and the controls (age 1-8 years)

| NBS (% of 829 mutations) |      |                |      |                           |               |               |
|--------------------------|------|----------------|------|---------------------------|---------------|---------------|
| To:                      | T    | C              | A    | G                         | Total         | Corrected     |
| From:                    |      |                |      |                           |               |               |
| T                        | /    | 6.8            | 3.3  | 3.6                       | <b>13.6↓*</b> | <b>16.4↓*</b> |
| C                        | 11.2 | /              | 3.6  | 7.0                       | 21.8          | 22.1          |
| A                        | 6.4  | 5.1            | /    | 11.7                      | 23.2          | 27.9          |
| G                        | 3.7  | <b>16.6↑**</b> | 21.0 | /                         | <b>41.4↑*</b> | <b>33.6↑*</b> |
| Total                    | 21.4 | 28.5           | 27.9 | 22.3                      | 100           |               |
| G vs. C mutation ratio   |      |                |      | <b>1.9↑*</b>              |               |               |
| Transversions (at G)     |      |                |      | 49.3% ( <b>20.4%↑**</b> ) |               |               |

  

| Controls II (% of 808 mutations) |      |      |      |               |       |           |
|----------------------------------|------|------|------|---------------|-------|-----------|
| To:                              | T    | C    | A    | G             | Total | Corrected |
| From:                            |      |      |      |               |       |           |
| T                                | /    | 7.7  | 4.3  | 5.3           | 17.3  | 20.6      |
| C                                | 13.2 | /    | 3.0  | 8.9           | 25.1  | 25.0      |
| A                                | 5.9  | 4.7  | /    | 11.0          | 21.7  | 25.7      |
| G                                | 3.2  | 12.0 | 20.7 | /             | 35.9  | 28.7      |
| Total                            | 22.4 | 24.4 | 28.0 | 25.2          | 100   |           |
| G vs. C mutation ratio           |      |      |      | 1.4           |       |           |
| Transversions (at G)             |      |      |      | 47.4% (15.2%) |       |           |
